# Supplementary material for: Facile Composition of CoNi and Graphene as a Free-Standing Cathode for a High-Performance Solid-State Zinc–Air Battery
Source: MDPI journal article supplement (doi:10.3390/en17092045), 2024-04-25
Supplement: s1 [file s1]

Archive with 1 entries (1 files):
- energies-2951717-supplementary.pdf
