# Supplementary material for: Facile Composition of CoNi and Graphene as a Free-Standing Cathode for a High-Performance Solid-State Zinc–Air Battery
Source: MDPI journal article supplement (doi:10.3390/en17092045), 2024-04-25
Supplement: s1 [file s1 › energies-2951717-supplementary.pdf]

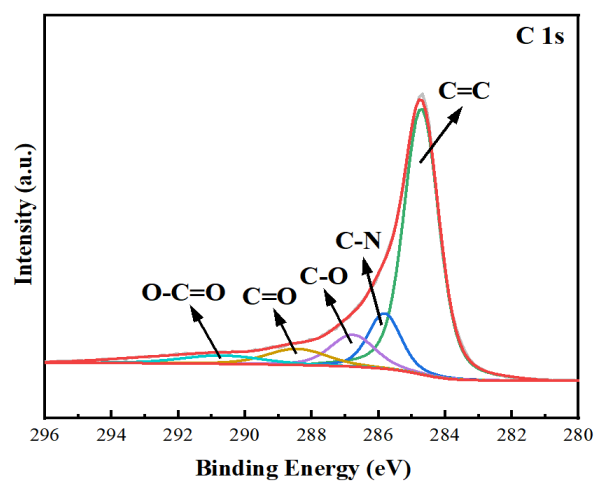

**Figure S1.** XPS of C 1s

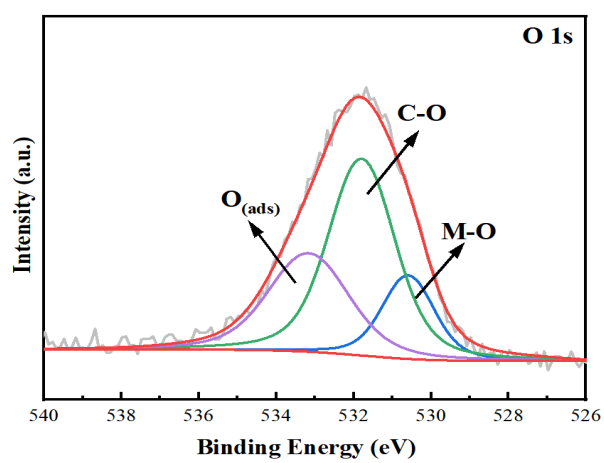

**Figure S2.** XPS of O 1s

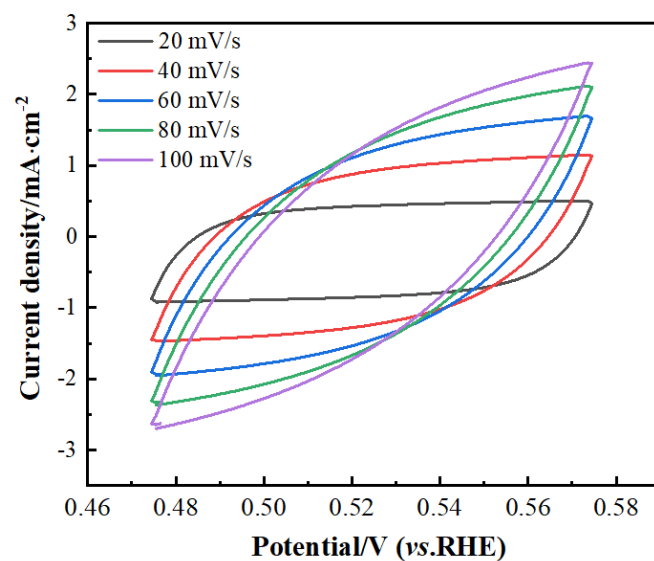

**Figure S3.** CV curves of CoNi/graphene at different sweep speeds in the range of 0.46V-0.58V

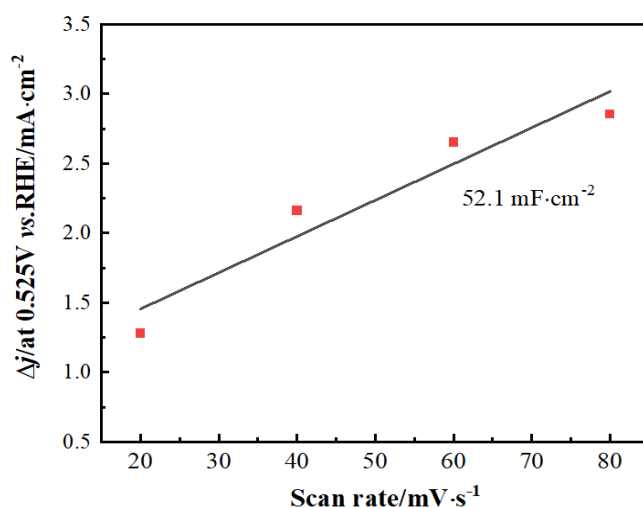

**Figure S4.** Based on the CV curve, the relationship between current density and sweep speed at 0.525V

Only Phen and only urea are added to the catalyst as reference catalysts, marked as CoNi-Phen-Graphene, CoNi-Urea-Graphene.

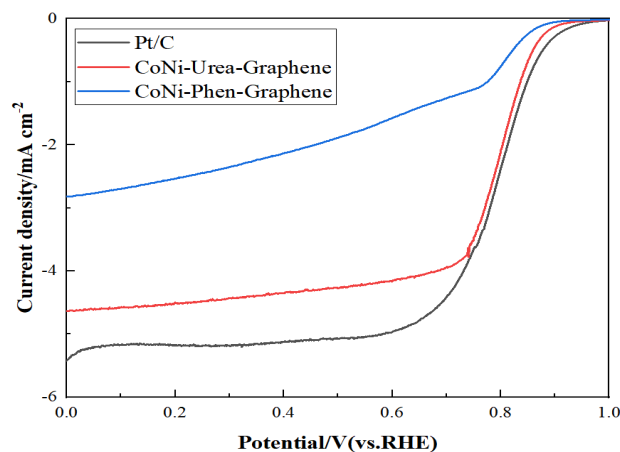

**Figure S5.** LSV curves of CoNi-Urea-Graphene, CoNi-Phen-Graphene and Pt/C for ORR recorded at  $5.0 \text{ mV s}^{-1}$  and 1600 rpm on RDE in  $\text{O}_2$ -saturated  $0.1 \text{ mol L}^{-1} \text{ KOH}$ ,

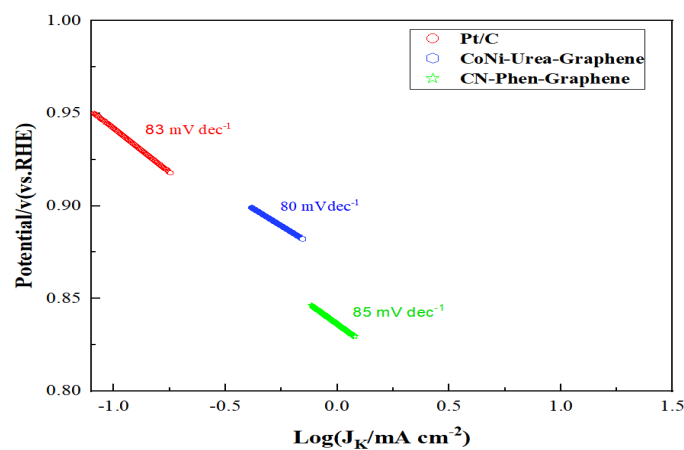

**Figure S6.** Corresponding Tafel plots

The number of electron transfer ( $n$ ) of each  $\text{O}_2$  molecule during ORR can be calculated by the slope of Koutecky–Levitch (K–L) as the following equation:

$$\frac{1}{j} = \frac{1}{j_L} + \frac{1}{j_k} = \frac{1}{B\omega^{1/2}} + \frac{1}{j_k}$$

$$B = 0.2nFC_0D_0^{2/3}\nu^{-1/6}$$

where  $j$  is the measured current density,  $j_k$  is the kinetic current density, and  $j_L$  is the limiting diffusion current density.  $B$  is the Levitch constant,  $F$  is the Faraday constant ( $96485 \text{ C mol}^{-1}$ ),  $\omega$  is the rotational speed (rpm),  $C_0$  is the volume concentration of saturated oxygen in  $0.1 \text{ M KOH}$  ( $1.2 \times 10^{-6} \text{ mol cm}^{-3}$ ),  $D_0$  is the diffusion coefficient of

oxygen in the electrolyte solution ( $1.73 \times 10^{-5} \text{ cm}^2 \text{ s}^{-1}$ ),  $\nu$  is the viscosity coefficient ( $0.01 \text{ cm}^2 \text{ s}^{-1}$ ) in the 0.1 M KOH electrolyte solution, and  $n$  is the electron transfer number.

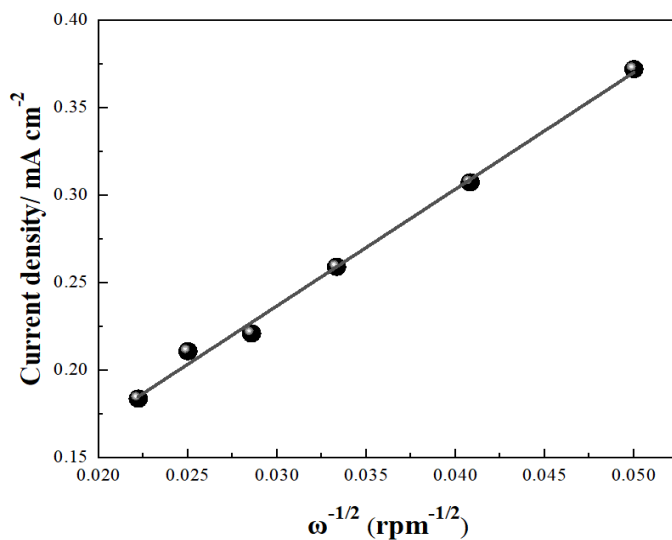

**Figure S7.** Electron transfer numbers ( $n$ ) of ORR on the CoNi/graphene

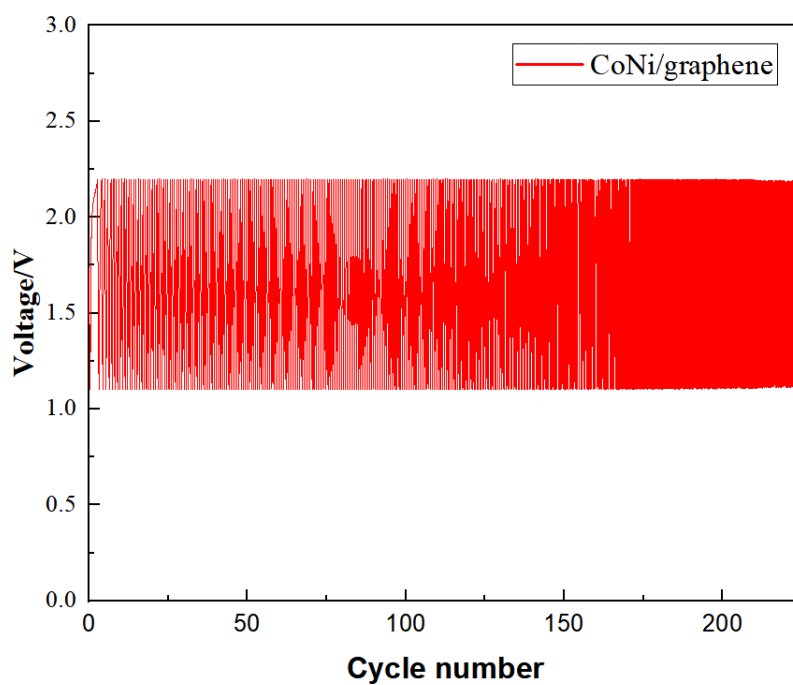

**Figure S8.** Galvanostatic discharge and charge cycling curves of SZABs with 15 min discharge and 15 min charge at  $8 \text{ mA cm}^{-2}$

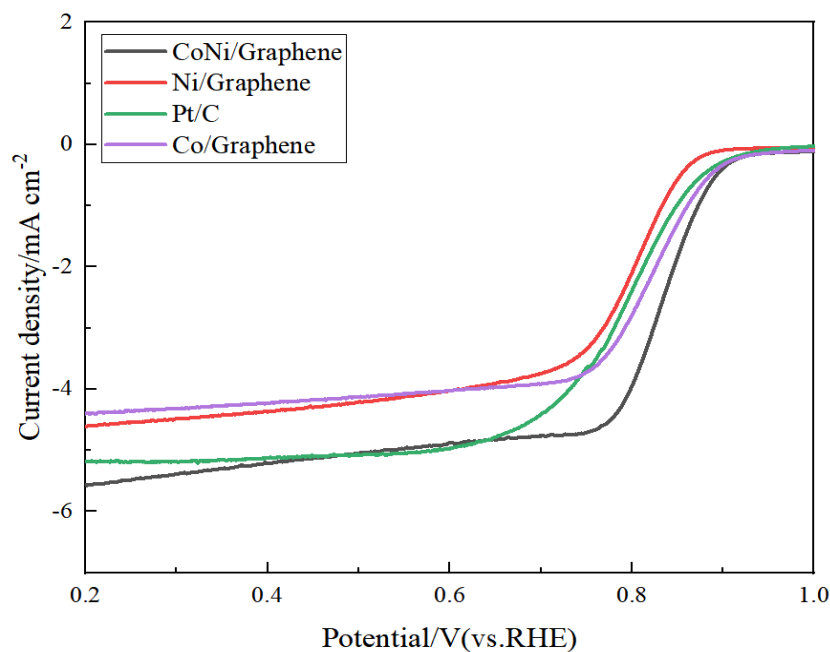

**Figure S9.** LSV curves of CoNi/Graphene, Co/Graphene, Ni/Graphene and Pt/C for ORR recorded at  $5.0 \text{ mV s}^{-1}$  and 1600 rpm on RDE in  $\text{O}_2$ -saturated  $0.1 \text{ mol L}^{-1} \text{ KOH}$

*(In the contrast catalyst, only Co, Ni and CoNi were added, and the other nitrogen and carbon sources did not change.)*

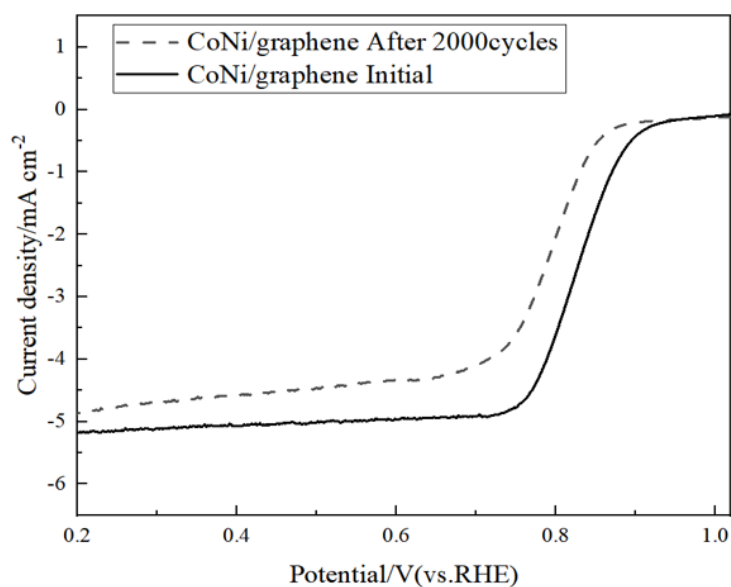

**Figure S10.** ORR polarization curves at 1600 rpm with a scan rate of  $10 \text{ mV s}^{-1}$  before and after 2000 cycles accelerated degradation test

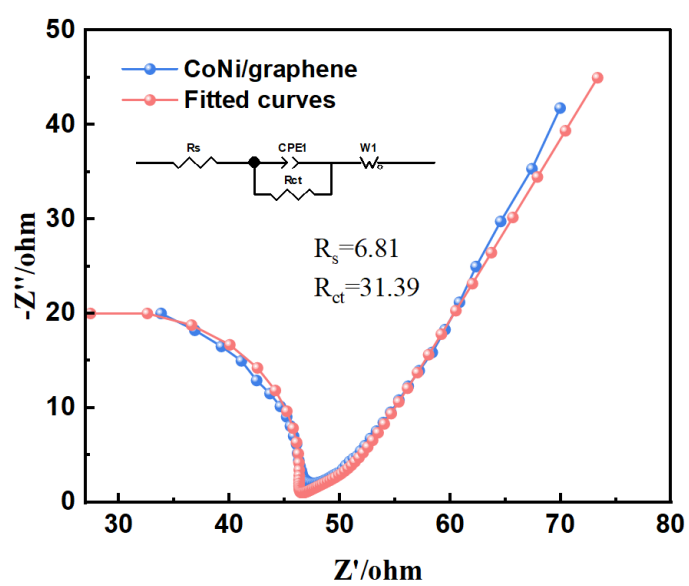

**Figure S11.** electrochemical impedance spectroscopy of CoNi/graphene

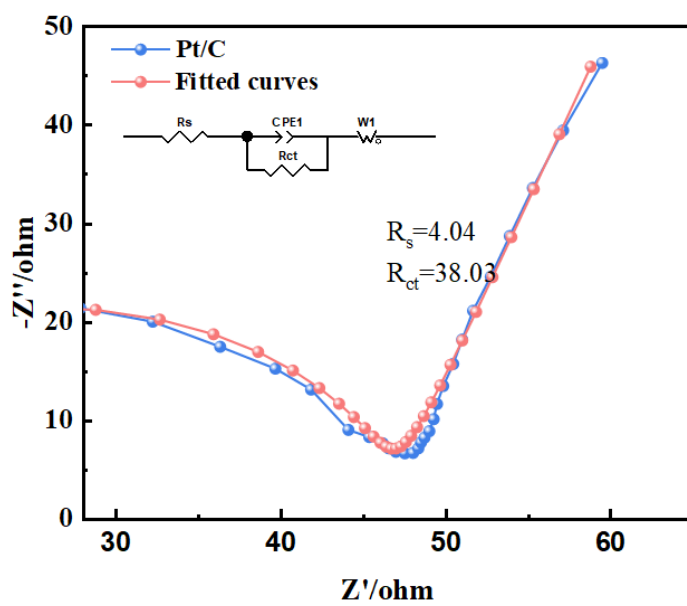

**Figure S12.** electrochemical impedance spectroscopy of Pt/C

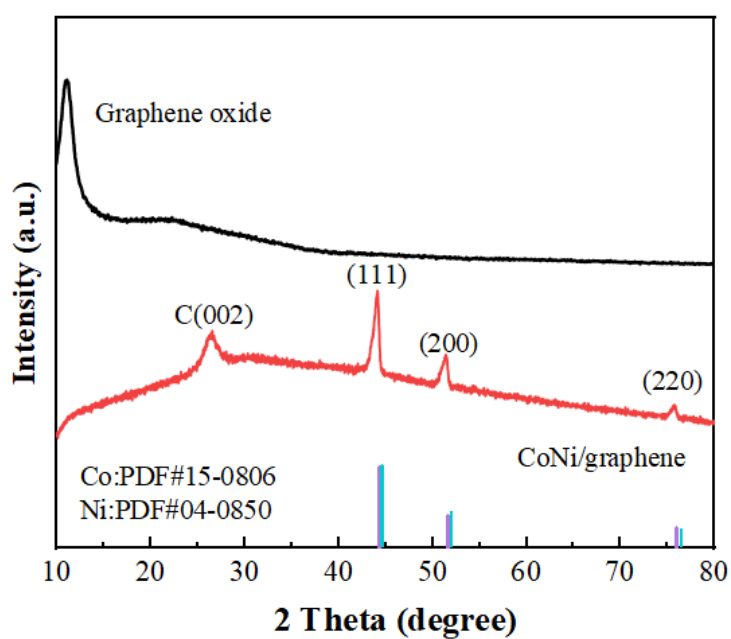

**Figure S13.** XRD patterns of Graphene oxide and CoNi/graphene

**Table S1.** Comparison of ORR performance for CoNi/graphene with other non-precious metal electrocatalysts in alkaline media

| Catalyst                       | Electrolyte | Half-wave Potential (V vs. RHE) | Limiting Current Density @1600 rpm ( $\text{mA cm}^{-2}$ ) | Reference                  |
|--------------------------------|-------------|---------------------------------|------------------------------------------------------------|----------------------------|
| N-doped carbon nanotube arrays | 0.1 M KOH   | 0.84                            | 5.6                                                        | Science 2009, 323, 760     |
| Fe-N-C capsules                | 0.1 M KOH   | 0.83                            | 4.9                                                        | ACS Nano 2016, 10, 5922    |
| N-doped porous carbon fiber    | 0.1 M KOH   | 0.82                            | 4.7                                                        | Adv. Mater. 2016, 28, 3000 |
| N, S-doped Graphene sheets     | 0.1 M KOH   | 0.77                            | 4.4                                                        | Nano Energy 2016, 19, 373  |

|                                |           |      |     |                                    |
|--------------------------------|-----------|------|-----|------------------------------------|
| FeNi/N-LCN                     | 0.1 M KOH | 0.85 | 4.8 | Nano Letter 2021, 21, 3105         |
| N, S-doped porous carbo        | 0.1 M KOH | 0.85 | 5.8 | Energy Environ. Sci. 2017, 10, 742 |
| CoNi-CoN <sub>4</sub> -HPC-900 | 0.1 M KOH | 0.78 | 7.1 | Nano Energy 2022, 99, 107325       |
| CoNi/graphene                  | 0.1 M KOH | 0.83 | 5.7 | This Work                          |

**Table S2.** Comparison of ORR performance for CoNi/graphene with other non-precious metal electrocatalysts in alkaline media

| Catalyst                    | Electrolyte | Half-wave Potential (V vs. RHE) | Limiting current density @1600 rpm (mA cm <sup>-2</sup> ) | Power density (mW cm <sup>-2</sup> ) | Reference                               |
|-----------------------------|-------------|---------------------------------|-----------------------------------------------------------|--------------------------------------|-----------------------------------------|
| Fe-N-C capsules             | 0.1 M KOH   | 0.83                            | 4.9                                                       | 125 (liquid state)                   | ACS Nano 2016, 10, 5922                 |
| N-doped porous carbon fiber | 0.1 M KOH   | 0.82                            | 4.7                                                       | 185 (liquid state)                   | Adv. Mater. 2016, 28, 3000              |
| N, S-doped Graphene sheets  | 0.1 M KOH   | 0.77                            | 4.4                                                       | --                                   | Nano Energy 2016, 19, 373               |
| CoDNi-N/C                   | 0.1 M KOH   | 0.84                            | 5.5                                                       | --                                   | Appl. Catal. B Environ. 2019, 112 – 121 |
| FeNi/N-LCN                  | 0.1 M KOH   | 0.85                            | 4.8                                                       | 162 (liquid state)                   | Nano Letter 2021, 21, 3105              |
| Co/N@CNTs@CN                | 0.1 M       | 0.86                            | 5.5                                                       | 133                                  | Adv. Funct.                             |

|                                                          |           |      |     |                                         |                                      |
|----------------------------------------------------------|-----------|------|-----|-----------------------------------------|--------------------------------------|
| MF                                                       | KOH       |      |     | (liquid state )                         | Mater. 2020, 2003407                 |
| CoNi-CoN <sub>4</sub> -HPC-900                           | 0.1 M KOH | 0.78 | 7.1 | --                                      | Nano Energy 2022, 99, 107325         |
| N-GQDs/NiCo <sub>2</sub> S <sub>4</sub> / C              | 0.1 M KOH | --   | --  | 26.2 (solid state)                      | Small 2019, 15, 1903610              |
| Co <sub>3</sub> O <sub>4</sub> @LaNiO <sub>3</sub> /NCNT | 0.1 M KOH | --   | --  | 28.2 (solid state)                      | Adv. Mater. 2015, 27, 5617           |
| N@CNTs@C NM F                                            | 0.1 M KOH | --   | --  | 26.5 (solid state)                      | Adv. Funct. Mater. 2020, 30, 2003407 |
| CoNi/graphene                                            | 0.1 M KOH | 0.83 | 5.7 | 210 (liquid state )<br>40 (solid state) | This Work                            |
